1 **Composition and consistence of the bacterial microbiome in**  
2 **upper, middle and lower esophagus before and after Lugol's**  
3 **iodine staining**

4 Jian Yin,<sup>a,\*</sup> Li Dong,<sup>a,b,\*</sup> Jing Zhao,<sup>a,b</sup> Dantong Shao,<sup>a</sup> Anqi liu,<sup>a</sup> Juxiao Li,<sup>a</sup>  
5 Aisong Yu,<sup>a</sup> Wenqiang Wei,<sup>a,#</sup> Wen Chen<sup>a,#</sup>

6 <sup>a</sup>Department of Epidemiology, National Cancer Center/National Clinical  
7 Research Center for Cancer/Cancer Hospital, Chinese Academy of Medical  
8 Sciences and Peking Union Medical College, Beijing 100021, China

9 <sup>b</sup>Institutes of Biomedical Sciences, Shanxi University, Taiyuan, 030006,  
10 China

11 <sup>c</sup>School of Public Health, Peking Union Medical College, Beijing 100730,  
12 China.

13 **Running title:** Bacterial microbiome in the esophagus

14 <sup>\*</sup>Co-first authors.

15 #Address correspondence to Wen Chen, [chenwen@cicams.ac.cn](mailto:chenwen@cicams.ac.cn); Wenqiang  
16 Wei, [weiwq@cicams.ac.cn](mailto:weiwq@cicams.ac.cn)

17

18

19 **ABSTRACT**

20 Esophageal bacteria, as the integral composition of human ecosystem, have  
21 been reported to be associated with esophageal lesions. However, few  
22 studies focus on microbial compositions in different esophageal segments,  
23 especially after Lugol's iodine staining (LIS) in the endoscopic examination  
24 for the screening of esophageal cancer. To investigate the composition of the  
25 bacterial microbiome in upper, middle and lower esophagus and if LIS  
26 would affect the detection of bacteria, 141 fasting samples including the  
27 upper, middle and lower esophagus from 27 participants were collected by  
28 brushing the mucosal surface of the esophagus before (Eso) and after (Lug)  
29 LIS. Bacterial V3-V4 region of 16S rRNA gene was amplified and  
30 sequenced by Illumina's sequencing platform and analyzed using LEfSe  
31 system to identify specific microbiota. The top six abundant bacterial phyla  
32 taxa among three locations from both Eso and Lug groups were  
33 Proteobacteria, Firmicutes, Bacteroidetes, Actinobacteria, Fusobacteria and  
34 TM7. In terms of genera, the bacterium in three locations from two groups  
35 was all characterized by a highest relative abundance of *Streptococcus*.  
36 Bacteria diversity and the relative abundance between Eso and Lug were  
37 comparable ( $P > 0.05$ ). Bacteria diversity was consistent in different  
38 esophageal locations for an individual, but it was significantly distinguishing

39 in different subjects ( $P < 0.05$ ). In Conclusion, the bacterial microbiome in  
40 healthy esophagus are highly diverse and consistent even among three  
41 physiological stenosis at all clades. Lugol's iodine staining would not change  
42 local microenvironment in term of microbial composition. These finding  
43 provide an essential baseline for future studies investigating local and  
44 systemic bacterial microbiome and esophageal diseases.

45 **Keywords:** Bacteria; Microbiome; 16S rRNA gene; Esophageal microbiome;  
46 Lugol's iodine staining.

47

## 48 INTRODUCTION

49 The bacterial microbiome are integral components in all parts of the human  
50 digestive tract, from the oral cavity to the anus. Their balance plays crucial  
51 roles in the development of mucosal barrier function against the pathogens  
52 and immune responses (1). When the balanced bacterial microbiome were  
53 disordered with damage of the mucosal barrier, the dysregulated immune  
54 response will result in many diseases, such as obesity (2), type 2 diabetes (3),  
55 atherosclerosis (4) and cancers (5-7). Therefore, it is essential to test the  
56 bacteria of healthy individual to observe significant variations both in  
57 pre-clinical conditions and in disease status to understand disease occurrence  
58 and progression.

59 The esophagus consists of the upper, middle and lower segments. It plays the  
60 primary role of transferring the food from the oral cavity to the stomach. The  
61 environment of the proximal esophageal mucosa is similar to the oral  
62 cavity's one, which the pH value is usually around 7; the environment of  
63 middle esophagus is intermediate between the oral-like one and gastric one;  
64 the environment of the distal is more like the gastric one because reflux of  
65 gastric materials may occur and cause a sudden lowering of pH values  
66 (down to 2) (8). In addition, the incidence and the survival time of  
67 esophageal squamous cell carcinoma in upper, middle and lower esophagus

68 are different (9) and the tumor location is an independent factor affecting  
69 survival time of patients with esophageal cancer. Since the  
70 microenvironment of three segments of esophagus exist differences,  
71 bacterial microbiome in three locations may be possibly different.

72 Moreover, studies have demonstrated that screening and diagnosis for  
73 esophageal disease with endoscopic Lugol's iodine staining (LIS)  
74 examination could improve early detection of precancerous lesion (such as  
75 dysplasia (10) and intraepithelial neoplasia (11)) and esophageal carcinoma  
76 (12), but there are few studies compared the bacterial composition before  
77 and after LIS.

78 In this study, using the high-throughput next-generation sequencing (NGS)  
79 to sequence V3-V4 region of 16S rRNA gene of bacteria, we compared the  
80 composition and consistence of bacterial microbiome in lower, middle and  
81 upper of the healthy esophagus before and after the LIS during endoscopy  
82 examination in a population-based esophageal cancer screening.

## 83 **MATERIALS AND METHODS**

84 **Subjects Recruitment.** Residents in Linzhou city aged between 40 to 69  
85 years old with no contraindications for endoscopic examinations (eg, history  
86 of reaction to iodine or lidocaine) and who were mentally and physically  
87 competent to provide written informed consent and no consumption of any

88 food or beverage at least 6 hours prior to sample collection were enrolled in  
89 Linzhou cancer hospital in Jun 2015. Based on the endoscopy-aided biopsy  
90 diagnostics by endoscopists and pathologists, 27 esophageal disease-free  
91 individuals were included in the final analyses. This project was approved by  
92 Institutional Review Board approval of Cancer Hospital, Chinese Academy  
93 of Medical Sciences (Number: 15-048/975).

94 **Screening Procedure and Sample collection.** After the informed and  
95 signed consent from the participants were obtained, the socio-demographic  
96 information and the history of using antibiotics were surveyed by trained  
97 interviewers. With general anesthesia, subjects underwent endoscopy  
98 examination by local trained endoscopists. Three mucosal samples from  
99 three anatomic locations, the upper third, then the middle third and finally  
100 the lower third in order along the esophageal tract were obtained with sterile  
101 covered brushes respectively. Thereafter, the Lugol's iodine (1.2%) solution  
102 was used to stain the full length of the esophagus, after 2 minutes, the  
103 matched samples from the same three locations were collected as previously.  
104 Biopsy were taken at the unstained foci indicating the abnormal lesions and  
105 confirmed by pathological diagnosis. All the microbiological samples are  
106 preserved in PreservCyt solution (Hologic, Bedford, MA, USA) and  
107 transported to the lab on dry ice, and stored in -70 °C refrigerator for use.

108 **Quality control.** The prevention and control of contamination from  
109 environment and cross-contamination of bacteria from adjacent habitat sites  
110 were crucial to accurately determine the site-specific or inter-individual  
111 diversity of the microbiome during the sampling and testing. Besides the  
112 strict sterile operation, some measures were taken to control and preclude the  
113 possibility of contamination as follows. Firstly, a covered esophageal  
114 sampling brush in a protective sheath was used so that it was threaded  
115 through the endoscope channel, was deployed at the site of sampling, and  
116 was then re-sheathed before being retracted through the endoscope. Secondly,  
117 samples collection begun from the upper third, followed with middle third  
118 with a new brush and ended at lower third with a new brush to avoid the  
119 cross contamination along the endoscope channel surface. Once retracted its  
120 end of brush rich with bacterial cells were unsheathed and cut with a sterile  
121 scissor before immersed into the cytological preservation solutions and  
122 sealed immediately. Finally, to evaluate the environment bacterial  
123 microbiome during sample collection, three esophageal sampling brushes as  
124 the negative control with the same exposure time in the same environment  
125 were tested with the collected samples in the same batch of test. The amount  
126 of DNA extracted from three negative controls was beyond the detection  
127 limitation of Qubit ( $< 0.01$  ng/ $\mu$ L).

128 **DNA extraction and MiSeq sequencing of 16S rRNA gene amplicons.**

129 DNA was extracted by traditional phenol-chloroform method combining  
130 enzymatic, chemical and physical extraction methods and was purified by  
131 standard methods (13). DNA density and quality were checked using Qubit  
132 and agarose gel electrophoresis (AxyPrep™ DNA Gel Extraction Kit,  
133 AXYGEN, CA, USA). Extracted DNA was diluted to 2ng/μL and stored at  
134 -20°C for downstream use. Universal primers  
135 5'-GTACTCCTACGGGAGGCAGCA-3' and  
136 5'-GTGGACTACHVGGGTWTCTAAT-3' with 8nt barcodes were used to  
137 amplify the V3-V4 hypervariable regions of 16S rRNA genes for sequencing  
138 using Miseq sequencer. The PCR mixture (25 μL) contained 1x PCR buffer,  
139 1.5 mM MgCl<sub>2</sub>, each deoxynucleoside triphosphate at 0.4 μM, each primer  
140 at 1.0 μM and 1 U of TransStart Fast Pfu DNA Polymerase (TransStart®,  
141 TransGen Biotech, Beijing, China) and 4 ng genomic DNA. The PCR  
142 amplification program included initial denaturation at 94 °C for 3 min,  
143 followed by 23 cycles of 94 °C for 30 s, 60 °C for 40 s, and 72 °C for 60 s,  
144 and a final extension at 72 °C for 10 min. we conducted three PCR for each  
145 sample, and combined them together after PCR amplification. PCR products  
146 were subjected to electrophoresis using 1.0% agarose gel. The band with a  
147 correct size was excised and purified using Gel Extraction Kit (Omega



148 Bio-tek, USA) and quantified with Qubit. All samples were pooled together  
149 with equal molar amount from each sample. The sequencing library was  
150 prepared using TruSeq DNA kit (Illumina, CA, USA) according to  
151 manufacturer's instruction. The purified library was diluted, denatured,  
152 re-diluted, mixed with PhiX (equal to 30% of final DNA amount) as  
153 described in the Illumina library preparation protocols, and then applied to  
154 an Illumina Miseq system for sequencing with the Reagent Kit v3 600 cycles  
155 (Illumina, CA, USA) as described in the manufacturer's manual.

156 **Bioinformatics and statistical analysis.** All sequences were processed  
157 using the Operational taxonomic unit (OTU) picking (QIIME) pipeline  
158 V1.9.1 (14). For each sample, OTUs were selected using open reference  
159 OTU picking using the Greengenes database version 13.8 (15) with 97%  
160 similarity. Samples were rarefied to 5598 reads (lowest number of reads  
161 from all samples). Linear discriminant effect size analysis (LEfSe) (16) was  
162 performed using the default parameters at any taxonomic level to find  
163 biomarkers differentially represented among the sites in esophagus. For the  
164 comparative analyses, we calculated the mean and standard deviation for the  
165 alpha diversity metrics by sample type. ANOVA and Student's t test were  
166 used to compare the difference by esophageal sampling location (upper,  
167 middle, lower esophagus), use of Lugol's staining (before/after), and

168 between individuals. The threshold on the logarithmic LDA score for  
169 discriminative biomarkers was 2.0. Principal coordinate analysis (PCoA)  
170 was applied to ordinate similarity matrices. Distance metrics were used to  
171 summarize the overall microbiota variability. Different distance metrics  
172 reveal distinctive views of the microbiota structure. We used both  
173 non-phylogeny-based distance (Bray-Curtis) and phylogeny-based distance  
174 (UniFrac) metrics. The original UniFrac distances include two versions:  
175 unweighted UniFrac, which uses OTU presence/absence information, and  
176 weighted UniFrac, which is based on the relative abundance OTUs.  
177 Unweighted UniFrac is most efficient to capture the variability in  
178 community membership as well as rare taxonomic lineages, because the  
179 probability of these rare taxa being picked up by sequencing is directly  
180 related to their abundance. Weighted UniFrac, on the other hand, is most  
181 efficient to capture the variability in the abundant lineages because these  
182 lineages contribute the most weight in distance calculations. A generalized  
183 version of UniFrac distance has been developed to fill the midpoint (17, 18).  
184 We used Pearson's correlation to evaluate the OTU correlation  
185 inter-individual and intra-individual (19). All statistical analyses were  
186 conducted using R 3.1.1.

## 187 **Results**

188 **Demographic characteristics of subjects.** The characteristics of healthy  
189 participants in high risk area of esophageal squamous cell carcinoma in  
190 China were listed in Table S1. The mean age of subjects was  $55.6 \pm 1.7$   
191 years old. Only one participant was ever cigarette smokers and no one  
192 alcohol drinkers, and none of the subjects had received antibiotics within at  
193 least one months before the investigation (Table S1). Finally, 141 fasting  
194 samples in different sections, including the upper, middle and lower  
195 esophagus, from 27 healthy subjects prior to (Eso) and after (Lug)  
196 esophageal LIS remained for data analysis and were showed in figure 1.

197 **Comparison of microbial communities from esophagus before and after**  
198 **LIS.** In the esophagus prior to LIS, the bacterial microbiome at the phyla  
199 level in upper esophagus (UpEso) and middle esophagus (MidEso) both  
200 consisted of Proteobacteria and Firmicutes followed in decreasing order of  
201 relative abundance by Bacteroidetes, Actinobacteria, Fusobacteria and TM7  
202 (Fig. 1a; Table S2); The top four relative abundant bacteria of lower  
203 esophagus (LowEso) were same as those of UpEso and MidEso, and the  
204 fifth and the sixth relative abundant bacteria were TM7 and Fusobacteria,  
205 but the difference between TM7 and Fusobacteria was only 0.10% of  
206 relative abundance. In terms of genera, the bacterial microbiome in Eso  
207 group was characterized by a highest relative abundance of *Streptococcus*,

208 and *Actinobacillus*, *Sphingomonas*, *Neisseria*, *Haemophilus* and [*Prevotella*]  
209 were all over 4% on average in each location of Eso.

210 In the esophagus after LIS, at the phyla level the top four relative abundant  
211 bacterial microbiome of upper esophagus (UpLug) were same as those of  
212 UpEso, and the fifth and the sixth bacteria were TM7 and Fusobacteria, but  
213 the different value between them was only 0.02%; the top six bacteria in  
214 Middle esophagus (MidLug) were identical with those in MidEso; the top  
215 four bacteria in Low esophagus (LowLug) were same as those in UpEso, but  
216 the fifth and sixth bacteria in LowLug were the reverse order with those in  
217 LowEso with different value between them at below 0.10%; Other phyla  
218 composed the remaining less than 1% in all locations not only Eso group but  
219 also Lug group (Fig. 1a; Table S2). As for genera, the bacterial microbiome  
220 in three locations of Lug group was similar to those in three segments of Eso  
221 group.

222 The phyla Proteobacteria, Firmicutes, Bacteroidetes, Actinobacteria were  
223 present in at least one esophageal site prior to LIS of all 100% of the  
224 subjects, respectively (Table S3). The phyla Fusobacteria and TM7 were  
225 present in at least one individual of 100.0%, 93.3% and 100.0%; 93.3%,  
226 100.0% and 100.0% in UpEso, MidEso and LowEso of the subjects. The  
227 remaining phyla were all below 87% present in at least one esophageal site

228 prior to LIS and the relative abundance of those were all less than 1%  
229 (Tables S2 and S3).

230 At the genera level, the bacteria with complete prevalence (100%) and high  
231 relative abundance ( $> 1\%$ ) were as follows: *Streptococcus*, *Sphingomonas*,  
232 *Haemophilus*, *Neisseria*, [*Prevotella*], *Prevotella*, *Veillonella* were present in  
233 at least one UpEso, MidEso and LowEso of the subjects. Moreover, the two  
234 genera bacteria with high prevalence ( $> 90\%$ ) and high relative abundance ( $>$   
235  $1\%$ ) were as follows: *Actinobacillus*, *Porphyromonas* were present in at least  
236 one UpEso, MidEso and LowEso of the subjects (Table S3).

237 Percentages of subjects for which phyla and genera detected in Lug (UpLug,  
238 MidLug and LowLug) were nearly same as those in UpEso, MidEso and  
239 LowEso, respectively.

240 **Similar diversity in esophagus microbiome between Eso and Lug,**  
241 **within-Eso and Lug.** Calculated microbial diversity indexes of the samples  
242 were shown in Table 1. The Chao1, Shannon, and Simpson indexes indicate  
243 that species richness and species diversity were not significantly different  
244 among samples prior to LIS (all  $P > 0.20$ ), among samples after LIS (all  $P >$   
245  $0.20$ ), and samples between prior to and after LIS (all  $P > 0.20$ ), after  
246 accounting for between individual differences ( $P < 0.05$ ).

247 The LEfSe system was used to determine statistically significant biomarkers

248 of clade abundance all taxonomic levels between these groups within the  
249 upper digestive tract. When we compared with the samples from three  
250 locations in the esophagus prior to LIS, there were not significantly different  
251 relative abundance clades. Furthermore, analyzing the influence of LIS for  
252 bacterial microbiome, we did not find the significantly different relative  
253 abundance clades in all between-group (UpEso and UpLug, MidEso and  
254 MidLug, and LowEso and LowLug), and the different abundance also did  
255 not present in three locations in esophagus after LIS.

256 We analyzed the similarity (or diversity) by Bray-Curtis (Fig. 2A),  
257 Unweighted UniFrac UniFrac (Fig. 2C) and Weighted UniFrac distance (Fig.  
258 2E), and all the PCoA plots showed separate, large clusters of the esophageal  
259 samples; the matched Eso-Lug and the samples of three locations Eso and  
260 Lug from an individual were all similar, and the similarity of intraindividual  
261 was significantly higher than interindividual based on the Bray-Curtis  
262 distance (Fig. 2B), the Unweighted UniFrac (Fig. 2D) and the Weighted  
263 UniFrac distance (Fig. 2F), (Fig. 2, all  $P < 1e-14$ ).

264 We further used Pearson's correlation to evaluate the OTU correlation  
265 inter-individual and intra-individual showed in figure 3. We compared the  
266 observed OTUs  $> 1\%$  of samples from the individuals. The median of  
267 significant pearson's correlations of matched Eso-Lug, intra Eso, inter Eso,

268 intra Lug and inter Lug were 0.82, 0.79, 0.61, 0.93 and 0.59 respectively.  
269 The proportions of significant pearson's correlation great than or equal to  
270 0.99 of matched Eso-Lug, intra Eso and intra Lug were 22.4%, 24.2% and  
271 14.8%, and of the inter Eso and inter Lug were only 1.3% and 3.9%. The  
272 proportions of significant pearson's correlation great than or equal to 0.50 of  
273 matched Eso-Lug, intra Eso and intra Lug were 81.0%, 71.0% and 87.0%,  
274 and of the inter Eso and inter Lug were only 62.0% and 60.1%. The matched  
275 Eso-Lug and three esophageal locations in Eso and Lug from an individual  
276 person were all similar, and the similarity of intra-individual was  
277 significantly higher than that of inter-individual.

## 278 **Discussion**

279 Esophageal cancer is a major upper gastrointestinal malignancy in China and  
280 the mortality in China accounts for nearly half of those worldwide according  
281 to the report of GLOBACAN in 2012 (20). However, it remains unclear  
282 about the biological etiology of esophagus cancer. Since the 1950s, the  
283 studies concerning biological causes of esophageal cancer mainly focused on  
284 pathogenic fungus (21) and virus (22), particularly single microorganism or  
285 several ones (23). Recently, a growing number of studies demonstrated  
286 microbial communities play an important role in human physiology and  
287 many diseases, in particular those of the digest tract associated with changes

288 in composition and diversity of microbial communities (24). However, basic  
289 composition of microbiome in the esophagus is not clear until now.

290 Traditional culture-based methods capture only a small proportion, typically  
291 less than 30%, of our bacterial microbiota (7). Culture-independent analysis  
292 using next-generation sequencing (NGS) which relies on the amplification  
293 and sequencing of the generally considered universal 16S rRNA gene has  
294 made up this gap, has been essential in defining and understanding the  
295 bacterial microbiome, and greatly has increased appreciation for the  
296 complexity hidden in even seemingly simple microbial consortia (25, 26).  
297 Even though it has been applying to test bacterial microbiome in human  
298 upper gastrointestinal tract, rare is used for detection of bacterial  
299 microbiome in the esophagus.

300 The study as a pilot research clarified firstly and successfully the baseline  
301 composition of bacterial microbiome in three esophageal segments, before  
302 and after Lugol's iodine staining using 16S rRNA gene sequencing in  
303 healthy population of Linzhou city, a high-risk area of an esophageal cancer,  
304 in Henan province of China.

305 **Bacterial microbiome in upper, middle and lower esophagus.** In this  
306 study, we identified the relative abundance and presentation of bacterial  
307 microbiota of esophageal mucosa samples in three anatomic locations from



308 27 individuals and found that the consistent distributions of bacterial  
309 microbiota of three locations were not only present at the phylum level but  
310 genus levels. The most common phyla bacteria were Proteobacteria,  
311 Firmicutes, Bacteroidetes, Actinobacteria, Fusobacteria and TM7 in three  
312 locations of esophagus, though the order present different, the difference  
313 value was very small. Moreover, the six phyla bacteria nearly present all  
314 three locations of individual esophagus. Therefore, the distribution of  
315 phylum bacteria in three locations of esophagus is similar. Furthermore, the  
316 most common genus was *Streptococcus*, followed by the *Actinobacillus*,  
317 *Sphingomonas*, *Neisseria*, *Haemophilus* and [*Prevotella*] in three locations  
318 of esophagus in Eso. In addition, there present some different relative  
319 abundance of bacteria in three locations in Eso group. These findings on  
320 microbiome in esophageal mucosa were basically consistent with those by  
321 Pei et al who performed biopsies of distal esophagus from only four patients  
322 without esophageal lesions by 16s rRNA gene sequencing (27).

323 We observed prevalent (present > 90% in at least one in UpEso, MidEso and  
324 LowEso) and high abundance of phyla (> 1%) and genera (> 1%) in three  
325 locations of esophageal samples prior to LIS. Moreover, the twenty-six  
326 phyla whose absolute value of different value of present among UpEso,  
327 MidEso and LowEso more than 20%, and the most different value was

328 46.7%. Therefore, the distribution of genus bacteria in three locations of  
329 esophagus is basically consistent.

330 Given that the different value of bacteria among UpEso, MidEso and  
331 LowEso, we further analyzed statistically significant biomarkers of clade  
332 abundance all taxonomic levels using LEfSe between different groups within  
333 esophageal sites. The biomarkers were not found among three locations of  
334 esophagus prior to LIS; Furthermore, richness and diversity were not  
335 significantly different among three locations of Eso, but significantly among  
336 different subjects ( $P < 0.05$ ).

337 Based on the findings above, we further compared the similarity (or  
338 diversity) in bacteria between intra-individual and inter-individual using the  
339 Bray-Curtis, Unweighted Unifrac and Weighted Unifrac measure of beta  
340 diversity. Intra-individual distance was very significantly lower (greater  
341 similarity) than inter-individual distance (lower similarity) for Eso. We  
342 further used Pearson's correlation to evaluate the OTU correlation  
343 inter-individual and intra-individual, the results were same as the Weighted  
344 UniFrac distance analysis. Therefore, the bacteria from three locations of  
345 esophagus was similar in an individual and was distinguishing from  
346 inter-individual; the three locations of esophagus were regarded as an  
347 integral whole environment to habitat for bacteria in healthy people.

348 **The effect of LIS for testing bacteria.** Plentiful studies showed that LIS  
349 chromoendoscopy is an effective way to boost the detection of esophageal  
350 diseases (28), especially precancerous lesion and cancer (29). Moreover, the  
351 Lugol's iodine (1.2%) solution is often used to a medication and disinfectant  
352 for numerous purposes. But it is unknown whether the solution affect the  
353 identification of bacteria with 16s rRNA gene sequencing. Therefore, we  
354 further analyze the microbiome of esophagus after LIS compared with prior  
355 to LIS.

356 The top six phyla bacteria of Lug were same as the bacteria of Eso not only  
357 as a whole (Lug vs Eso) but also as tripartite (UpLug vs UpEso; MidLug vs  
358 MidEso; LowLug vs LowEso). Moreover, the most common genus  
359 microbiome of UpLug, MidLug and LowLug were basically similar to those  
360 present in UpEso, MidEso, LowEso. Finally, percentages of subjects for  
361 which phyla and genera detected in UpLug, MidLug and LowLug were  
362 similar to UpEso, MidEso and LowEso, respectively, except for some  
363 different genera bacteria.

364 Using the LEfSe analysis to detect whether the LIS significantly affects  
365 some bacteria relative abundance, we did not find the influenced biomarkers  
366 between UpLug and UpEso, MidLug and MidLug, and LowLug and  
367 LowEso, and among three locations of esophagus after LIS. Furthermore,

368 richness and diversity were not significantly different among tripartite  
369 (UpLug vs UpEso; MidLug vs MidEso; LowLug vs LowEso), and among  
370 three locations of Lug, but significantly in different subjects ( $P < 0.05$ ). The  
371 results were same as Eso. The results after comparing the beta diversity in  
372 every sample measured by the Bray-Curtis, Unweighted Unifrac and  
373 Weighted Unifrac showed that the match Eso-Lug and the samples of three  
374 locations Lug from the same individual person were all similar, and the  
375 similarity of intra-individual were significantly higher than inter-individual  
376 for Lug. We further used Pearson's correlation to evaluate the OTU  
377 correlation of matched Eso-Lug, inter-individual and intra-individual, the  
378 matched Eso-Lug and three esophageal locations in Eso and Lug from an  
379 individual person were all similar, and the similarity of intra-individual were  
380 significantly higher than inter-individual. Therefore, the LIS do not  
381 significantly affect the detection of microbiome in the esophagus using the  
382 high-throughput 16s rRNA gene NGS technologies.

383 The study has several strengths in stringent inclusion criteria: the subjects  
384 were confirmed by physicians aided with esophageal endoscopy to avoid the  
385 bias of disease misclassification; a series of quality control methods were  
386 taken to minimize of the contamination of microbiota from handling  
387 environment and adjacent tracts. There are several limitations of the study

388 needing to be addressed in the future research. Firstly, compared to whole  
389 genome shotgun sequencing, microbiome diversity at the species level in  
390 high phylogenetic resolution couldn't be reached by 16S rRNA gene  
391 sequencing. Secondly, further large-scale studies are required for validating  
392 our findings, especially linking the demographic and clinical characteristics  
393 of individuals with the microbial compositions. Finally, since most of  
394 participants in our study were women, which might produce microbial bias  
395 in term of sex-relevance.

396 In conclusion, we showed that the bacterial microbiome in normal  
397 esophageal was highly diverse and consistent in different sections of  
398 esophagus in an individual. The most of high relative abundance bacteria  
399 were predominant in the esophagus mucosa. LIS did not significantly affect  
400 the bacterial diversity and relative abundance. These data comprehensively  
401 provide a critical baseline for future studies investigating the role of  
402 microbiome in the local and systemic esophageal diseases affecting human  
403 health. Further studies are needed to expand the sample size to validate these  
404 findings.

#### 405 **Acknowledgements**

406 This study was supported by CAMS Innovation Fund for Medical Sciences  
407 (CIFMS) (Grant No. 2016-I2M-3-001); Natural Science Fund from the

408 National Natural Science Foundation of China (81573224); Fundamental  
409 Research Funds for the Central Universities (2016ZX310178).

410 **Conflicts of interest statement**

411 The authors declare that they have no competing interest.

## 412 REFERENCES

- 413 1. Segata N, Haake SK, Mannon P, Lemon KP, Waldron L, Gevers D, Huttenhower C, Izard J.  
414 2012. Composition of the adult digestive tract bacterial microbiome based on seven  
415 mouth surfaces, tonsils, throat and stool samples. *Genome Biol* 13:R42.
- 416 2. Turnbaugh PJ, Hamady M, Yatsunencko T, Cantarel BL, Duncan A, Ley RE, Sogin ML, Jones  
417 WJ, Roe BA, Affourtit JP, Egholm M, Henrissat B, Heath AC, Knight R, Gordon JI. 2009. A  
418 core gut microbiome in obese and lean twins. *Nature* 457:480-4.
- 419 3. Larsen N, Vogensen FK, van den Berg FW, Nielsen DS, Andreasen AS, Pedersen BK,  
420 Al-Soud WA, Sorensen SJ, Hansen LH, Jakobsen M. 2010. Gut microbiota in human  
421 adults with type 2 diabetes differs from non-diabetic adults. *PLoS One* 5:e9085.
- 422 4. Karlsson FH, Fak F, Nookaew I, Tremaroli V, Fagerberg B, Petranovic D, Backhed F,  
423 Nielsen J. 2012. Symptomatic atherosclerosis is associated with an altered gut  
424 metagenome. *Nat Commun* 3:1245.
- 425 5. Schwabe RF, Jobin C. 2013. The microbiome and cancer. *Nat Rev Cancer* 13:800-12.
- 426 6. Ma JL, Zhang L, Brown LM, Li JY, Shen L, Pan KF, Liu WD, Hu Y, Han ZX, Crystal-Mansour S,  
427 Pee D, Blot WJ, Fraumeni JF, Jr., You WC, Gail MH. 2012. Fifteen-year effects of  
428 *Helicobacter pylori*, garlic, and vitamin treatments on gastric cancer incidence and  
429 mortality. *J Natl Cancer Inst* 104:488-92.
- 430 7. Fraher MH, O'Toole PW, Quigley EM. 2012. Techniques used to characterize the gut  
431 microbiota: a guide for the clinician. *Nat Rev Gastroenterol Hepatol* 9:312-22.
- 432 8. Di Pilato V, Freschi G, Ringressi MN, Pallecchi L, Rossolini GM, Bechi P. 2016. The  
433 esophageal microbiota in health and disease. *Ann N Y Acad Sci* 1381:21-33.
- 434 9. Rice TW, Rusch VW, Apperson-Hansen C, Allen MS, Chen LQ, Hunter JG, Kesler KA, Law S,  
435 Lerut TE, Reed CE, Salo JA, Scott WJ, Swisher SG, Watson TJ, Blackstone EH. 2009.  
436 Worldwide esophageal cancer collaboration. *Dis Esophagus* 22:1-8.
- 437 10. Fagundes RB, de Barros SG, Putten AC, Mello ES, Wagner M, Bassi LA, Bombassaro MA,  
438 Gobbi D, Souto EB. 1999. Occult dysplasia is disclosed by Lugol chromoendoscopy in  
439 alcoholics at high risk for squamous cell carcinoma of the esophagus. *Endoscopy*  
440 31:281-5.
- 441 11. Hashimoto CL, Iriya K, Baba ER, Navarro-Rodriguez T, Zerbini MC, Eisig JN, Barbuti R,  
442 Chinzon D, Moraes-Filho JP. 2005. Lugol's dye spray chromoendoscopy establishes early  
443 diagnosis of esophageal cancer in patients with primary head and neck cancer. *Am J*  
444 *Gastroenterol* 100:275-82.
- 445 12. Tincani AJ, Brandalise N, Altemani A, Scanavini RC, Valerio JB, Lage HT, Molina G,  
446 Martins AS. 2000. Diagnosis of superficial esophageal cancer and dysplasia using  
447 endoscopic screening with a 2% lugol dye solution in patients with head and neck cancer.  
448 *Head Neck* 22:170-4.
- 449 13. Manichanh C, Rigottier-Gois L, Bonnaud E, Gloux K, Pelletier E, Frangeul L, Nalin R, Jarrin  
450 C, Chardon P, Marteau P, Roca J, Dore J. 2006. Reduced diversity of faecal microbiota in  
451 Crohn's disease revealed by a metagenomic approach. *Gut* 55:205-11.
- 452 14. Caporaso JG, Kuczynski J, Stombaugh J, Bittinger K, Bushman FD, Costello EK, Fierer N,  
453 Pena AG, Goodrich JK, Gordon JI, Huttley GA, Kelley ST, Knights D, Koenig JE, Ley RE,  
454 Lozupone CA, McDonald D, Muegge BD, Pirrung M, Reeder J, Sevinsky JR, Turnbaugh PJ,  
455 Walters WA, Widmann J, Yatsunencko T, Zaneveld J, Knight R. 2010. QIIME allows  
456 analysis of high-throughput community sequencing data. *Nat Methods* 7:335-6.
- 457 15. DeSantis TZ, Hugenholtz P, Larsen N, Rojas M, Brodie EL, Keller K, Huber T, Dalevi D, Hu  
458 P, Andersen GL. 2006. Greengenes, a chimera-checked 16S rRNA gene database and  
459 workbench compatible with ARB. *Appl Environ Microbiol* 72:5069-72.

- 460 16. Segata N, Izard J, Waldron L, Gevers D, Miropolsky L, Garrett WS, Huttenhower C. 2011.  
461 Metagenomic biomarker discovery and explanation. *Genome Biol* 12:R60.
- 462 17. Papapanou PN, Madianos PN, Dahlen G, Sandros J. 1997. "Checkerboard" versus culture:  
463 a comparison between two methods for identification of subgingival microbiota. *Eur J*  
464 *Oral Sci* 105:389-96.
- 465 18. Norder Grusell E, Dahlen G, Ruth M, Ny L, Quiding-Jarbrink M, Bergquist H, Bove M.  
466 2013. Bacterial flora of the human oral cavity, and the upper and lower esophagus. *Dis*  
467 *Esophagus* 26:84-90.
- 468 19. Sinha R, Chen J, Amir A, Vogtmann E, Shi J, Inman KS, Flores R, Sampson J, Knight R, Chia  
469 N. 2016. Collecting Fecal Samples for Microbiome Analyses in Epidemiology Studies.  
470 *Cancer Epidemiol Biomarkers Prev* 25:407-16.
- 471 20. Chen W, Zheng R, Baade PD, Zhang S, Zeng H, Bray F, Jemal A, Yu XQ, He J. 2016. Cancer  
472 statistics in China, 2015. *CA Cancer J Clin* 66:115-32.
- 473 21. Kamangar F, Qiao YL, Blaser MJ, Sun XD, Katki H, Fan JH, Perez-Perez GI, Abnet CC, Zhao  
474 P, Mark SD, Taylor PR, Dawsey SM. 2007. *Helicobacter pylori* and oesophageal and  
475 gastric cancers in a prospective study in China. *Br J Cancer* 96:172-6.
- 476 22. Koshiol J, Wei WQ, Kreimer AR, Chen W, Gravitt P, Ren JS, Abnet CC, Wang JB, Kamangar  
477 F, Lin DM, von Knebel-Doeberitz M, Zhang Y, Viscidi R, Wang GQ, Gillison ML, Roth MJ,  
478 Dong ZW, Kim E, Taylor PR, Qiao YL, Dawsey SM. 2010. No role for human  
479 papillomavirus in esophageal squamous cell carcinoma in China. *Int J Cancer*  
480 127:93-100.
- 481 23. Eslick GD. 2010. Infectious causes of esophageal cancer. *Infect Dis Clin North Am*  
482 24:845-52, vii.
- 483 24. Suerbaum S. 2009. Microbiome analysis in the esophagus. *Gastroenterology*  
484 137:419-21.
- 485 25. Kau AL, Ahern PP, Griffin NW, Goodman AL, Gordon JI. 2011. Human nutrition, the gut  
486 microbiome and the immune system. *Nature* 474:327-36.
- 487 26. Anonymous. 2012. Structure, function and diversity of the healthy human microbiome.  
488 *Nature* 486:207-14.
- 489 27. Pei Z, Bini EJ, Yang L, Zhou M, Francois F, Blaser MJ. 2004. Bacterial biota in the human  
490 distal esophagus. *Proc Natl Acad Sci U S A* 101:4250-5.
- 491 28. Zheng X, Mao X, Xu K, Lu L, Peng X, Wang M, Xu G, Hua Z, Wang J, Xue H, Wang J, Lu C.  
492 2015. Massive Endoscopic Screening for Esophageal and Gastric Cancers in a High-Risk  
493 Area of China. *PLoS One* 10:e0145097.
- 494 29. Dubuc J, Legoux J, Winnock M, Seyrig J, Barbier J, Barrioz T, Laugier R, Boulay G, Grasset  
495 D, Sautereau D, Grigoresco D, Butel J, Scoazec J, Ponchon T, Societe Francaise  
496 d'Endoscopie D. 2006. Endoscopic screening for esophageal squamous-cell carcinoma in  
497 high-risk patients: a prospective study conducted in 62 French endoscopy centers.  
498 *Endoscopy* 38:690-5.

## 499 **Table and Figures legends**

### 500 **Table 1** Microbial diversity indices in Eso and Lug

501 Note: Eso indicates the sample from esophagus prior to Lugol's iodine  
502 staining, Lug indicates the sample from esophagus after Lugol's iodine



503 staining, UpEso indicates upper esophagus, MidEso indicates middle  
504 esophagus, LowEso indicates lower esophagus. The addition of Lug at the  
505 end of the variable indicates the use of Lugol's staining for that sample.

506 **Figure 1** Distribution of Microbiota from three segments of Eso and Lug.

507 Taxonomic composition of the microbiota in the three esophageal habitats  
508 investigated based on average relative abundance of 16S rRNA gene next  
509 generation sequencing reads assigned to phylum (upper chart: A) and genus  
510 (lower chart: B); UpEso, MidEso, LowEso, UpLug, MidLug and LowLug  
511 indicate Upper, Middle and Lower esophagus prior to and after Lugol's  
512 iodine staining. Labels indicated genera at average relative abundance  $\geq 1\%$   
513 in at least one body site. The remaining genera were binned together in all  
514 phylum as 'other' along with the fraction of reads that could not be assigned  
515 at the genus level as 'unclassified' (uncl). See table S2 for detailed values.

516 Note: Eso indicate the sample from esophagus prior to Lugol's iodine  
517 staining; Lug indicates the sample from esophagus after Lugol's iodine  
518 staining; UpEso indicates upper esophagus; MidEso indicates middle  
519 esophagus; LowEso indicates lower esophagus. The addition of Lug at the  
520 end of the variable indicates the use of Lugol's staining for that sample.

521 **Figure 2** Community structure similarity of intraindividual and  
522 interindividual samples in Eso and Lug.

523 Note: Eso indicates the sample from esophagus prior to Lugol's iodine  
524 staining; Lug indicates the sample from esophagus after Lugol's iodine  
525 staining; Matched Eso-lug indicated the match esophageal samples from  
526 prior to and after lugol's iodine staining; intra Eso indicated the three  
527 esophageal samples of individual Eso; inter Eso indicated the samples from  
528 different individual Eso; intra Lug indicated the three esophageal samples of  
529 individual Lug; inter Lug indicated the samples from different individual  
530 Lug.

531 **Figure 3** OTU correlation samples between Eso and Lug

532 Note: Eso indicates the sample from esophagus prior to Lugol's iodine  
533 staining; Lug indicates the sample from esophagus after Lugol's iodine  
534 staining; Matched Eso-lug indicated the matched esophageal samples from  
535 prior to and after lugol's iodine staining; intra Eso indicated the three  
536 esophageal samples of individual Eso; inter Eso indicated the samples from  
537 different individual Eso; intra Lug indicated the three esophageal samples of  
538 individual Lug; inter Lug indicated the samples from different individual  
539 Lug.

**Table 1** Microbial diversity indices in Eso and Lug

| Samples | Chao1         | Shannon     | Simpson     |
|---------|---------------|-------------|-------------|
| Eso     | 661.9 ± 429.3 | 5.30 ± 1.13 | 0.88 ± 0.10 |
| UpEso   | 672.3 ± 362.0 | 5.23 ± 1.06 | 0.88 ± 0.10 |
| MidEso  | 645.5 ± 444.1 | 5.33 ± 1.03 | 0.89 ± 0.09 |
| LowEso  | 669.9 ± 489.0 | 5.32 ± 1.33 | 0.88 ± 0.12 |
| Lug     | 650.2 ± 462.8 | 5.10 ± 1.36 | 0.85 ± 0.14 |
| UpLug   | 664.0 ± 488.8 | 4.82 ± 1.31 | 0.84 ± 0.13 |
| MidLug  | 671.0 ± 502.7 | 5.24 ± 1.21 | 0.87 ± 0.12 |
| LowLug  | 618.0 ± 415.2 | 5.25 ± 1.54 | 0.86 ± 0.17 |

Note: Eso indicates the sample from esophagus prior to Lugol's iodine staining; Lug indicates the sample from esophagus after Lugol's iodine staining; UpEso indicates upper esophagus; MidEso indicates middle esophagus; LowEso indicates lower esophagus. The addition of Lug at the end of the variable indicates the use of Lugol's staining for that sample.



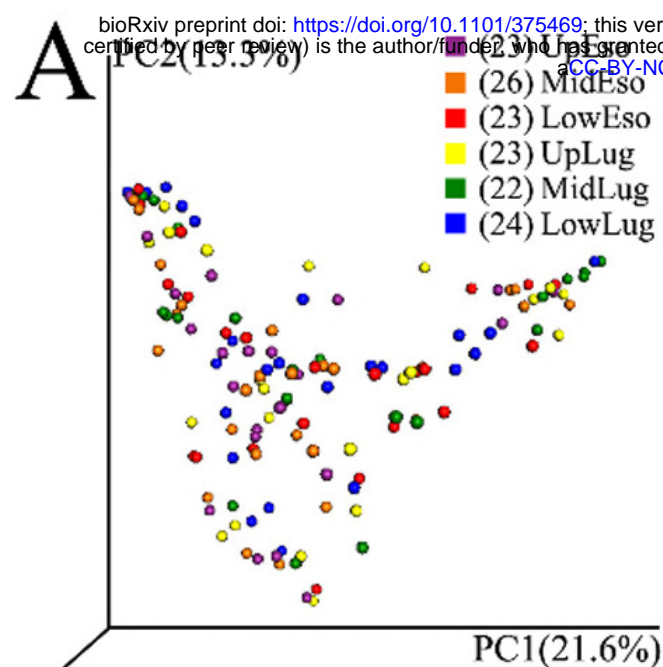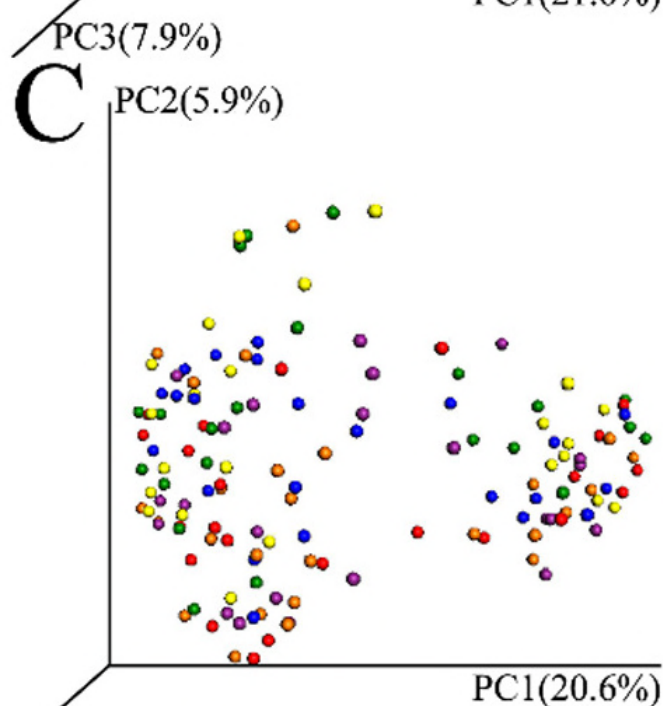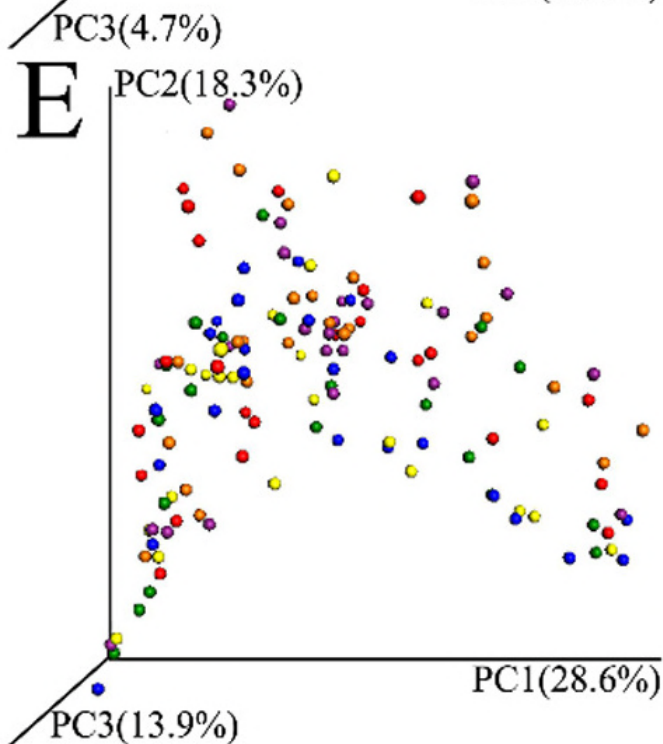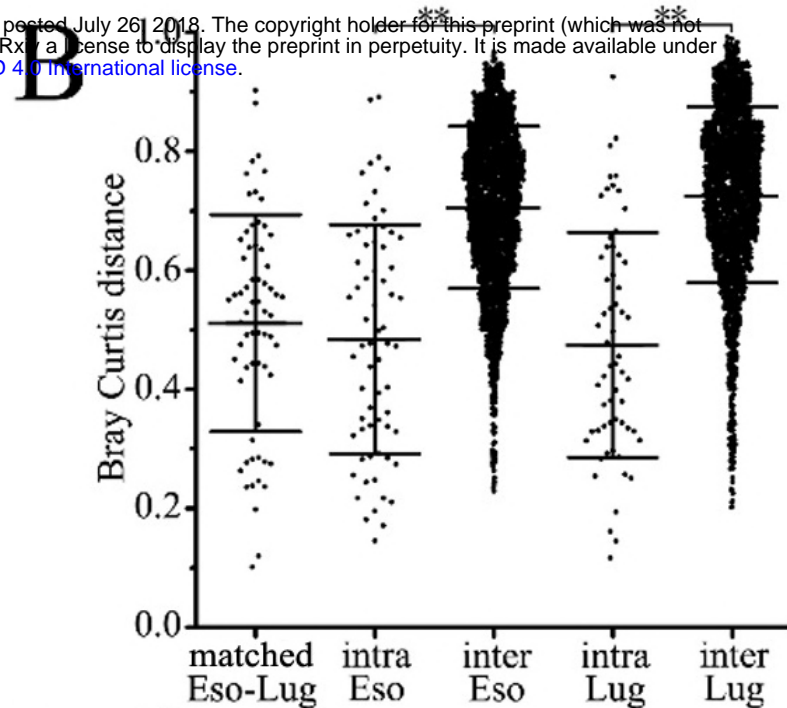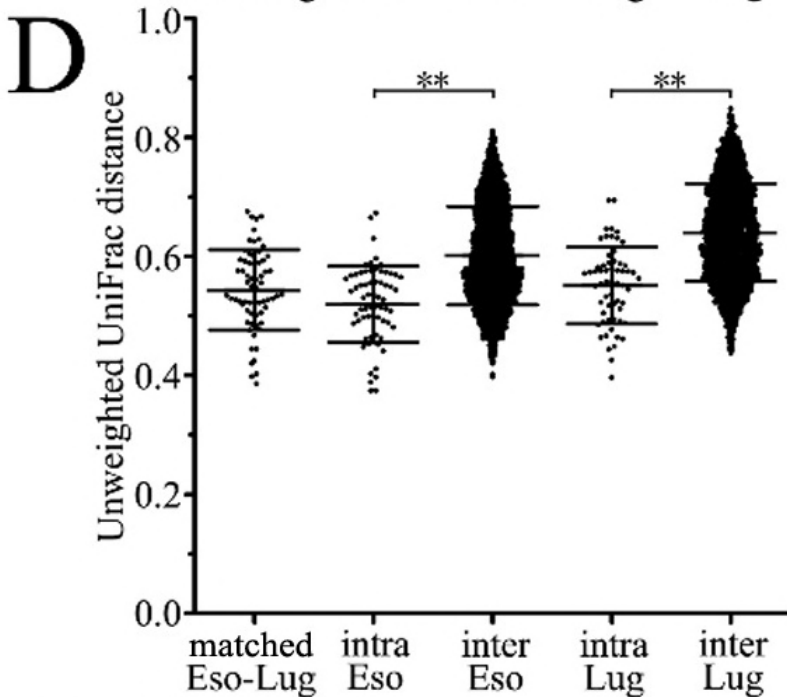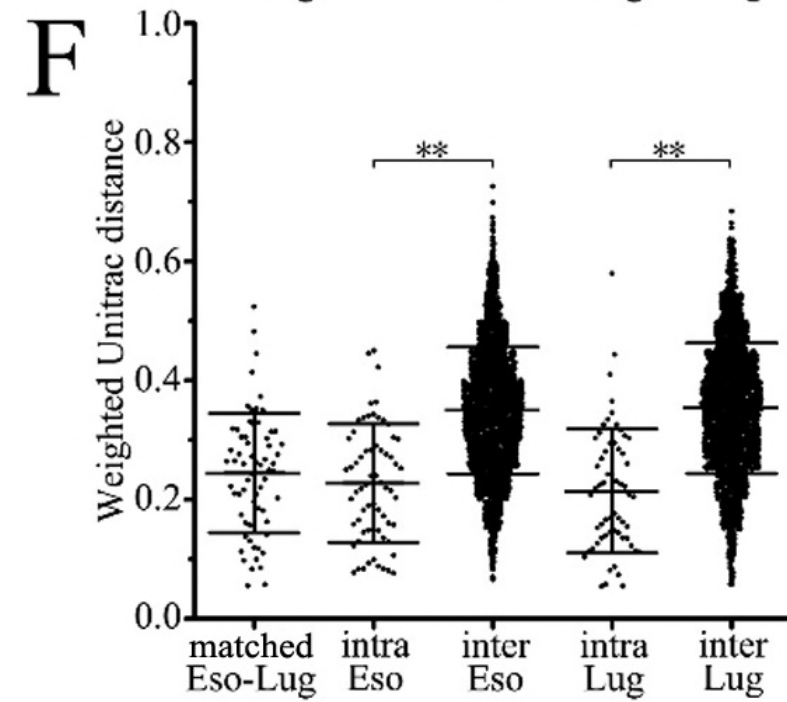

**A**

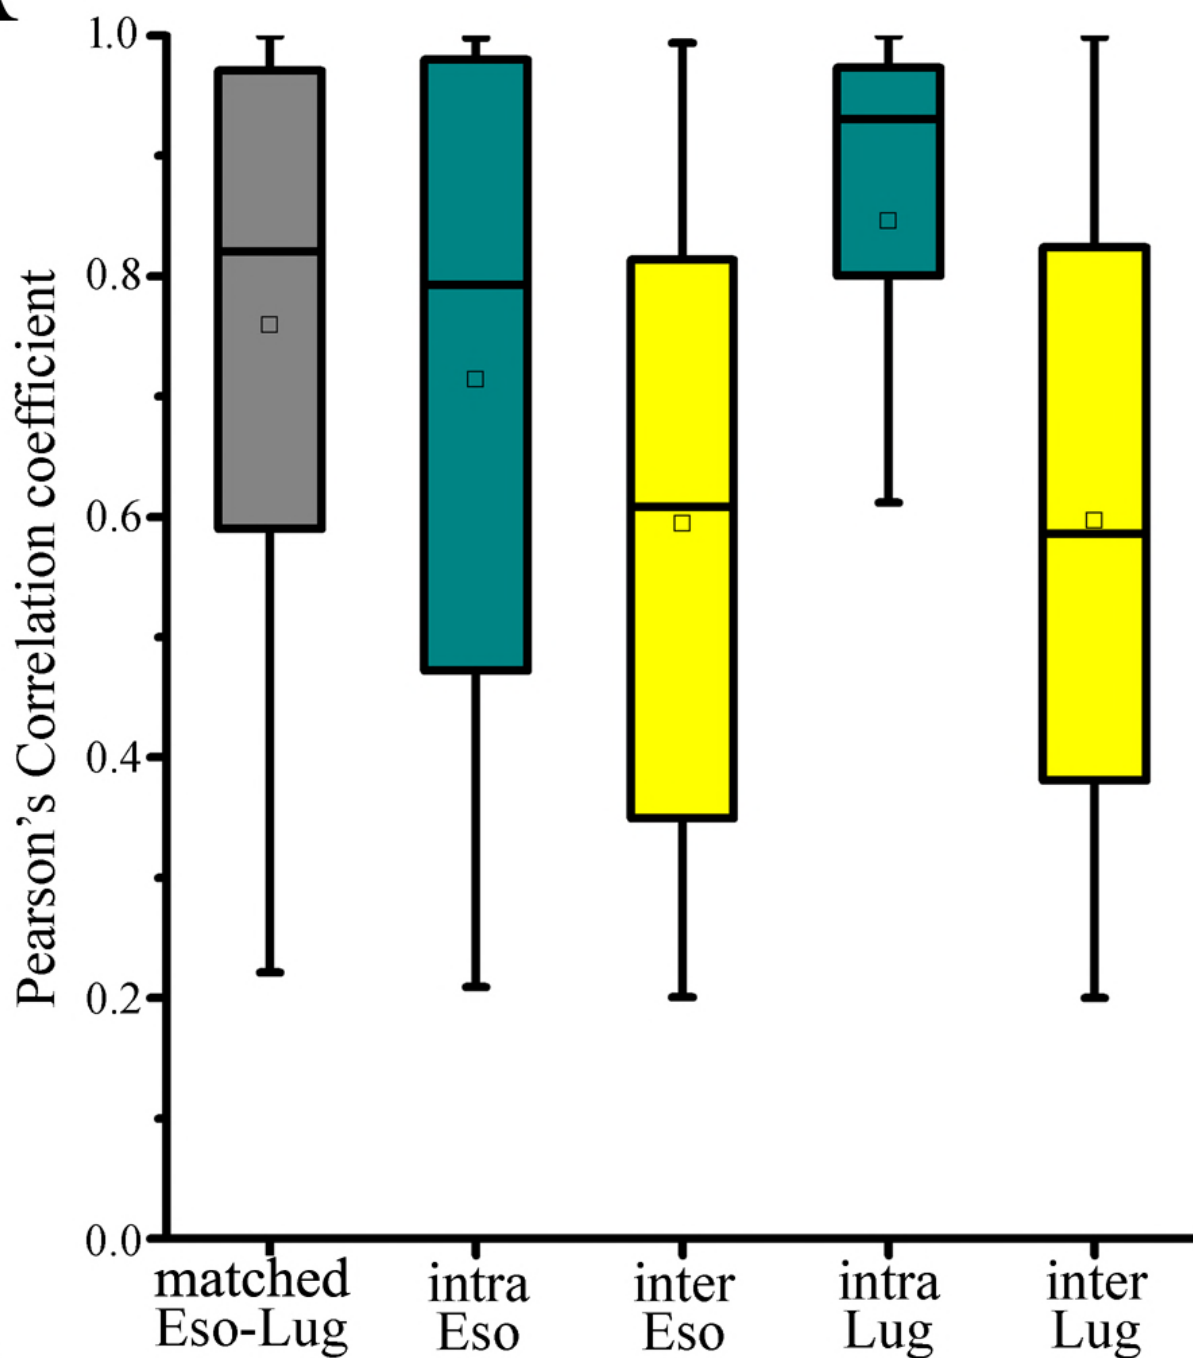

**B**

| Pearson $r$ | matched Eso-Lug | intra Eso | inter Eso | intra Lug | inter Lug |
|-------------|-----------------|-----------|-----------|-----------|-----------|
| $\geq 0.99$ | 22.4%           | 24.2%     | 1.3%      | 14.8%     | 3.9%      |
| $\geq 0.90$ | 44.8%           | 45.2%     | 12.9%     | 57.4%     | 13.9%     |
| $\geq 0.80$ | 55.2%           | 48.4%     | 28.3%     | 74.1%     | 29.3%     |
| $\geq 0.70$ | 69.0%           | 54.8%     | 39.6%     | 79.6%     | 40.0%     |
| $\geq 0.60$ | 75.9%           | 59.7%     | 51.9%     | 87.0%     | 49.3%     |
| $\geq 0.50$ | 81.0%           | 71.0%     | 62.0%     | 87.0%     | 60.1%     |
| $< 0.50$    | 19.0%           | 29.0%     | 38.0%     | 13.0%     | 39.9%     |
